# Supplementary material
Source: PubMed Central journal article supplement (PMC8176388)
Supplement: jama-e218828-s003.pdf [file jama-e218828-s003.pdf]

| <b>Group Name(s): BLAZE-2 Investigators</b> |                  |                             |                         |                                                                                                                   |                                                 |                                                                |                                                                                                   |
|---------------------------------------------|------------------|-----------------------------|-------------------------|-------------------------------------------------------------------------------------------------------------------|-------------------------------------------------|----------------------------------------------------------------|---------------------------------------------------------------------------------------------------|
| <b>First Name and Middle Initial(s)</b>     | <b>Last Name</b> | <b>Suffix (eg, Jr, III)</b> | <b>Academic Degrees</b> | <b>Institution</b>                                                                                                | <b>Location (city, state/province, country)</b> | <b>Role or Contribution, eg, chair, principal investigator</b> | <b>Group (if more than 1 Group listed in the byline) and/or Subgroup (eg, Steering Committee)</b> |
| Kwadwo-Agyei                                | Gyamfi           |                             | MD                      | Care Access Research                                                                                              | Lumberton, NC                                   | Principal Investigator                                         |                                                                                                   |
| Jason                                       | Begue            |                             | MD                      | Jason Begue Care Access                                                                                           | Greenville, MS                                  | Principal Investigator                                         |                                                                                                   |
| Scott                                       | Borgetti         |                             | MD                      | College of Medicine, University of Illinois at Chicago                                                            | Chicago, IL                                     | Principal Investigator                                         |                                                                                                   |
| Greer                                       | Burkholder       |                             | MD                      | University of Alabama at Birmingham School of Medicine<br>Department of Medicine Division of Infectious Diseases  | Birmingham, AL                                  | Principal Investigator                                         |                                                                                                   |
| Srilatha                                    | Edupuganti       |                             | MD                      | Emory University School of Medicine                                                                               | Atlanta, GA                                     | Principal Investigator                                         |                                                                                                   |
| Kathleen                                    | Gannon           |                             | DO                      | Integrated Clinical Trial Services, Inc                                                                           | West Des Moines, IA                             | Principal Investigator                                         |                                                                                                   |
| Christopher                                 | Hall             |                             | MD                      | East Bay Aids Center and The Jordan Research & Education Inst. at Alta Bates Summit Medical Center - Sutter Healt | Oakland, CA                                     | Principal Investigator                                         |                                                                                                   |
| Victoria                                    | Horstman         |                             | MD                      | Care Access Research                                                                                              | Scottsdale, AZ                                  | Principal Investigator                                         |                                                                                                   |
| Rubaba                                      | Hussain          |                             | MD                      | Care Access Research                                                                                              | Bronx, NY                                       | Principal Investigator                                         |                                                                                                   |
| Leandro                                     | Mena             |                             | MD                      | University of Mississippi Medical Center                                                                          | Jackson, MS                                     | Principal Investigator                                         |                                                                                                   |
| Tina                                        | Merritt          |                             | MD                      | Allergy and Asthma Clinic of Northwest Arkansas                                                                   | Bentonville, AR                                 | Principal Investigator                                         |                                                                                                   |
| Charles                                     | Montano          |                             | MD                      | Montano Wellness LLC                                                                                              | CROMWELL, CT                                    | Principal Investigator                                         |                                                                                                   |
| Jason                                       | Morris           |                             | MD                      | Care Access Research                                                                                              | Lake Charles, LA                                | Principal Investigator                                         |                                                                                                   |
| Meenakshi                                   | Patel            |                             | MD                      | Valley Medical Primary Care                                                                                       | Centerville, OH                                 | Principal Investigator                                         |                                                                                                   |
| Ayesha                                      | Rashid           |                             | MD                      | St. Paul Infectious Disease Associates- Care Access Research                                                      | St Paul, MN                                     | Principal Investigator                                         |                                                                                                   |
| Hormoz                                      | Solomon          |                             | MD                      | Hormoz Solomon Care Access Research                                                                               | Boston, MA                                      | Principal Investigator                                         |                                                                                                   |

Supplemental Online Content: Nonauthor Collaborators

| First Name and Middle Initial(s) | Last Name | Suffix (eg, Jr, III) | Academic Degrees | Institution                                   | Location (city, state/province, country) | Role or Contribution, eg, chair, principal investigator | Group (if more than 1 Group listed in the byline) and/or Subgroup (eg, Steering Committee) |
|----------------------------------|-----------|----------------------|------------------|-----------------------------------------------|------------------------------------------|---------------------------------------------------------|--------------------------------------------------------------------------------------------|
| Mousumi                          | Som       |                      | DO               | OSU Medicine Internal Medicine-Houston Center | Tulsa, OK                                | Principal Investigator                                  |                                                                                            |
| George                           | Taffet    |                      | MD               | Baylor College of Medicine - Geriatrics       | Houston, TX                              | Principal Investigator                                  |                                                                                            |
