# Supplementary material
Source: PubMed Central journal article supplement (PMC8176388)
Supplement: jama-e218828-s004.pdf [file jama-e218828-s004.pdf]

Cohen MS, Nirula A, Mulligan MJ, et al; BLAZE-2 Investigators. Effect of bamlanivimab vs placebo on incidence of COVID-19 among residents and staff of skilled nursing and assisted living facilities: a randomized clinical trial. *JAMA*. Published online June 3, 2021. doi:10.1001/jama.2021.8828

## **Data Sharing Statement**

### **Data**

**Data available:** No
